# Supplementary material for: Stress-induced Cdk5 activity enhances cytoprotective basal autophagy in Drosophila melanogaster by phosphorylating acinus at serine437
Source: eLife. 2017 Dec 11;6:e30760. doi: 10.7554/eLife.30760 (PMC5760206; doi:10.7554/eLife.30760)
Supplement: Figure 1—source data 1. [file elife-30760-fig1-data1.xlsx]

## Sheet: Sheet1
Quantification of Acn proteins in Western blots
Sample	acn WT	acn S437A	acn S437D
1	1.7	1.4	7.2
2	1.6	1.3	6.8
3	1.9	1.1	6.4
