# Supplementary material for: Stress-induced Cdk5 activity enhances cytoprotective basal autophagy in Drosophila melanogaster by phosphorylating acinus at serine437
Source: eLife. 2017 Dec 11;6:e30760. doi: 10.7554/eLife.30760 (PMC5760206; doi:10.7554/eLife.30760)
Supplement: Figure 2—source data 1. — Quantification of Atg8a punctae in eye discs. [file elife-30760-fig2-data1.xlsx]

## Sheet: Sheet1
Quantification of Atg8a puncate in eye discs
sample	acn wt	acn S437A	acn S437D
#1	125	61	348
#2	167	65	291
#3	139	71	311
#4	171	55	356
#5	137	83	269
