# Supplementary material for: Stress-induced Cdk5 activity enhances cytoprotective basal autophagy in Drosophila melanogaster by phosphorylating acinus at serine437
Source: eLife. 2017 Dec 11;6:e30760. doi: 10.7554/eLife.30760 (PMC5760206; doi:10.7554/eLife.30760)
Supplement: Figure 2—source data 2. — Quantification of integrated intensity of Atg8a punctae in fat bodies from fed and starved larvae with or without Chloroquine treatment. [file elife-30760-fig2-data2.xlsx]

## Sheet: FED
Quantification of integrated density of fluorescence of Atg8a punctae in fed larvae
	sample	Area	Mean	Min	Max	Int Den	% Area	Raw Int Den			Int Density normalized to mean of Acn-WT
Acn-WT	1	18211.8	11.454	0	255	208604	4.492	12010755			0.866432
	2	18211.8	13.293	0	255	242087	5.213	13938555			1.0055
	3	18211.8	20.267	0	255	369094	7.948	21251190	Acn wt Fed		1.53302
	4	18211.8	7.559	0	255	137672	2.964	7926675			0.571815
	5	18211.8	13.527	0	255	246356	5.305	14184375			1.02323
Acn-S437A	1	18211.8	9.254	0	255	168541	3.629	9704025			0.700029
	2	18211.8	5.754	0	255	104783	2.256	6033045			0.435212
	3	18211.8	0.955	0	255	17387.8	0.374	1001130	S437A Fed		0.0722196
	4	18211.8	0.536	0	255	9761.24	0.21	562020			0.040543
	5	18211.8	2.216	0	255	40360.3	0.869	2323815			0.167635
Acn-S437D	1	18211.8	22.973	0	255	418387	9.009	24089340			1.73776
	2	18211.8	29.463	0	255	536576	11.554	30894270			2.22865
	3	18211.8	40.505	0	255	737678	15.884	42473055	S437D Fed		3.06392
	4	18211.8	41.955	0	255	764069	16.453	43992600			3.17354
	5	18211.8	40.922	0	255	745269	16.048	42910125			3.09545
Acn-WT +QC	1	18211.8	25.294	0	255	460643	9.919	26522295			1.91327
	2	18211.8	26.73	0	255	486804	10.482	28028580			2.02193
	3	18211.8	20.605	0	255	375250	8.08	21605640	Acn wt Fed+CQ		1.55859
	4	18211.8	17.252	0	255	314198	6.766	18090465			1.30501
	5	18211.8	22.589	0	255	411394	8.859	23686695			1.70871
Acn-S437A+QC	1	18211.8	5.782	0	255	105292	2.267	6062370			0.437328
	2	18211.8	0.423	0	255	7706.24	0.166	443700			0.0320077
	3	18211.8	0.77	0	255	14017.4	0.302	807075	S437A Fed+CQ		0.0582208
	4	18211.8	1.145	0	255	20860	0.449	1201050			0.0866414
	5	18211.8	1.056	0	255	19230.2	0.414	1107210			0.079872
Acn-S437D+QC	1	18211.8	59.743	0	255	1.08804e+06	23.429	62645595			4.51913
	2	18211.8	72.271	0	255	1.31619e+06	28.342	75781920	S437D Fed+CQ		5.46676
	3	18211.8	84.265	0	255	1.53461e+06	33.045	88358010			6.37397
	4	18211.8	60.705	0	255	1.10554e+06	23.806	63653355			4.59183
	5	18211.8	74.036	0	255	1.34832e+06	29.034	77631945			5.60022

## Sheet: STARVED
Quantification of integrated density of fluorescence of Atg8a punctae in starved larvae
	sample	Area	Mean	Min	Max	Int Den	% Area	Raw Int Den		Int Density normalized to mean of Acn-WT
Acn-WT	1	18211.8	56.353	0	255	1.02629e+06	22.099	59090640		4.26268
	2	18211.8	43.308	0	255	788725	16.984	45412185		3.27595
	3	18211.8	39.678	0	255	722602	15.56	41605035	Acn wt stv	3.00131
	4	18211.8	30.757	0	255	560133	12.061	32250615		2.3265
	5	18211.8	38.742	0	255	705564	15.193	40624050		2.93054
Acn-S437A	1	18211.8	32.67	0	255	594979	12.812	34256955		2.47123
	2	18211.8	28.683	0	255	522375	14.22	30076649		2.16967
	3	18211.8	45.269	0	255	824431	17.753	47467995	S437A stv	3.42425
	4	18211.8	44.317	0	255	807092	17.379	46469670		3.35223
	5	18211.8	31.953	0	255	581928	12.531	33505470		2.41702
Acn-S437D	1	18211.8	77.226	0	255	1.40642e+06	30.285	80977290		5.84154
	2	18211.8	87.496	0	255	1.59347e+06	34.312	91746705	S437D stv	6.61843
	3	18211.8	57.463	0	255	1.04651e+06	22.535	60254460		4.34664
	4	18211.8	65.867	0	255	1.19955e+06	25.83	69066240		4.9823
	5	18211.8	81.807	0	255	1.48986e+06	32.081	85780980		6.18807
Acn-WT +QC	1	18211.8	77.884	0	255	1.41841e+06	30.543	81667575		5.89134
	2	18211.8	85.814	0	255	1.56283e+06	33.653	89982870	Acn wt+CQ stv	6.49119
	3	18211.8	110.099	0	255	2.0051e+06	43.176	115447170		8.32813
	4	18211.8	89.298	0	255	1.62628e+06	35.019	93636000		6.75472
	5	18211.8	82.63	0	255	1.50484e+06	32.404	86643900		6.25032
Acn-S437A+QC	1	18211.8	82.395	0	255	1.50056e+06	32.312	86397315		6.23253
	2	18211.8	77.404	0	255	1.40967e+06	30.354	81163950		5.85501
	3	18211.8	80.017	0	255	1.45725e+06	31.379	83903925	S437A+CQ stv	6.05267
	4	18211.8	93.291	0	255	1.699e+06	36.585	97823100		7.05677
	5	18211.8	85.87	0	255	1.56385e+06	33.675	90041520		6.49542
Acn-S437D+QC	1	18211.8	109.102	0	255	1.98694e+06	42.785	114401415		8.25269
	2	18211.8	128.104	0	255	2.333e+06	50.237	134326350		9.69004
	3	18211.8	108.917	0	255	1.98357e+06	42.712	114207360	S437D+CQ stv	8.2387
	4	18211.8	97.58	0	255	1.77711e+06	38.267	102320280		7.38119
	5	18211.8	105.444	0	255	1.92033e+06	41.351	110566215		7.97603
