# Supplementary material for: Stress-induced Cdk5 activity enhances cytoprotective basal autophagy in Drosophila melanogaster by phosphorylating acinus at serine437
Source: eLife. 2017 Dec 11;6:e30760. doi: 10.7554/eLife.30760 (PMC5760206; doi:10.7554/eLife.30760)
Supplement: Figure 2—source data 3. — Quantification of lysotracker punctae in fat bodies from fed and starved larvae. [file elife-30760-fig2-data3.xlsx]

## Sheet: Sheet1
Quantification of lysotracker punctae in fat bodies
	condition	Acn-WT samples					Acn-S437A samples					Acn-S437D samples
	fed	2	5	4	7	5	2	3	4	5	3	30	47	57	55	49
	starved	22	29	27	21	18	17	20	21	23	23	51	47	57	55	49
