# Supplementary material for: Stress-induced Cdk5 activity enhances cytoprotective basal autophagy in Drosophila melanogaster by phosphorylating acinus at serine437
Source: eLife. 2017 Dec 11;6:e30760. doi: 10.7554/eLife.30760 (PMC5760206; doi:10.7554/eLife.30760)
Supplement: Figure 2—source data 4. [file elife-30760-fig2-data4.xlsx]

## Sheet: Figure 2S autolysosome diamete 
Quantification of autolysosome sizes [nm]
each number represent average diameters measured for the autolysosomes present in 25 different frames of EM images
	Acn-WT	Acn-S437D
	324.109	2982.81
	225.769	1220.22
	241.074	1958.45
	285.757	3222.82
	326.009	1858.58
	125.966	3656.73
	164.109	1780.21
	471.914	1504.98
	334.454	1762.89
	202.355	1872.35
	231.771	1122.97
	234.367	1634.78
	280.154	2563.96
	229.691	2200.65
	246.792	2134.67
	246.792	1345.67
	418.489	1982.64
	211.2	2113.43
	170.084	1654.78
	202.437	1777.98
	32.4101	2567.83
	306.409	2052.43
	273.457	1845.9
	322.073	2290.49
	140.03	1411.35

## Sheet: Figure 2T autolysosome area 
Quantification of Percentage of Autolysosomes areas
numbers represent average areas from 25 different frames of EM images
	Acn-WT	Acn-S437D
	0.2	34.7
	0.35	28.9
	0.04	12.7
	0.14	7.8
	0.11	4.5
	0.19	31.5
	0.02	4.3
	0.35	17.8
	0.15	17.9
	0.46	8.7
	0.49	11.6
	0.61	29.3
	0.56	9.7
	0.52	10.4
	0.09	5.5
	0.09	25.6
	0.15	27.3
	0.3	7.9
	0.18	8.6
	0.01	11.2
	0.02	8.9
	0.16	12.4
	0.21	19.8
	0.37	14.2
	0.11	15.3
