# Supplementary material for: Stress-induced Cdk5 activity enhances cytoprotective basal autophagy in Drosophila melanogaster by phosphorylating acinus at serine437
Source: eLife. 2017 Dec 11;6:e30760. doi: 10.7554/eLife.30760 (PMC5760206; doi:10.7554/eLife.30760)
Supplement: Figure 4—source data 1. — Quantification of efficiency of RNAi-mediated Kinase knockdowns. [file elife-30760-fig4-data1.xlsx]

## Sheet: Figure 4-supplement-1-RTqPCR
RTqPCR analysis of Kinase knockdowns
	SampleName	Ct		SampleName	Ct	ΔCt		SampleName	Ct		SampleName	Ct	ΔCt		ΔΔCt	Rel. Amt.	Avg	StDev
Da>Cdk5 RNAi	OreR fly rp49	17.1273		OreR fly cdk5	18.5963	1.469		Da>Cdk5 RNAi rp49	17.7748		Da>Cdk5 RNAi cdk5	20.3579	2.5831		1.1141	0.461979
	OreR fly rp49	17.2183		OreR fly cdk5	18.6203	1.402		Da>Cdk5 RNAi rp49	17.8657		Da>Cdk5 RNAi cdk5	20.5501	2.6844		1.2824	0.411111	0.41625	0.0433884
	OreR fly rp49	17.3093		OreR fly cdk5	18.6312	1.3219		Da>Cdk5 RNAi rp49	17.8826		Da>Cdk5 RNAi cdk5	20.617	2.7344		1.4125	0.37566
						ΔCt							ΔCt		ΔΔCt
Da>p38b RNAi 29405	OreR fly rp49	17.1273		OreR fly p38b	20.1965	3.0692		Da>29405 rp49	16.5271		Da>29405 p38b	20.1936	3.6665		0.5973	0.66099
	OreR fly rp49	17.2183		OreR fly p38b	20.2185	3.0002		Da>29405 rp49	16.5646		Da>29405 p38b	20.2807	3.7161		0.7159	0.608825	0.617852	0.0394076
	OreR fly rp49	17.3093		OreR fly p38b	20.2406	2.9313		Da>29405 rp49	16.5902		Da>29405 p38b	20.2981	3.7079		0.7766	0.583741
						ΔCt							ΔCt		ΔΔCt
Da>p38b RNAi 35252	OreR fly rp49	17.1273		OreR fly p38b	20.1965	3.0692		Da>35252 rp49	16.6314		Da>35252 p38b	23.3279	6.6965		3.6273	0.0809234
	OreR fly rp49	17.2183		OreR fly p38b	20.2185	3.0002		Da>35252 rp50	16.9143		Da>35252 p38b	23.2374	6.3231		3.3229	0.0999327	0.0810682	0.0187925
	OreR fly rp49	17.3093		OreR fly p38b	20.2406	2.9313		Da>35252 rp51	16.4555		Da>35252 p38b	23.3903	6.9348		4.0035	0.0623486
						ΔCt							ΔCt		ΔΔCt
arm>p35 RNAi 1	OreR fly rp49	17.1273		OreR fly p35	21.9462	4.8189		arm> p35 RNAi 1 rp49	16.9923		arm>p35 RNAi 1 p35	22.9441	5.9518		1.1329	0.455998
	OreR fly rp49	17.2183		OreR fly p35	22	4.7817		arm> p35 RNAi 1 rp50	17.0334		arm>p35 RNAi 1 p36	23.0402	6.0068		1.2251	0.427768	0.436823	0.0166151
	OreR fly rp49	17.3093		OreR fly p35	21.9685	4.6592		arm> p35 RNAi 1 rp51	16.9781		arm>p35 RNAi 1 p37	22.866	5.8879		1.2287	0.426702
						ΔCt							ΔCt		ΔΔCt
arm>p35 RNAi 2	OreR fly rp49	17.1273		OreR fly p35	21.9462	4.8189		arm>p35 RNAi 2 rp49	17.0979		arm>p35 RNAi 2 p35	22.6284	5.5305		0.7116	0.610643
	OreR fly rp49	17.2183		OreR fly p35	22	4.7817		arm>p35 RNAi 2 rp49	17.0723		arm>p35 RNAi 2 p35	22.6778	5.6055		0.8238	0.564952	0.532413	0.098611
	OreR fly rp49	17.3093		OreR fly p35	21.5685	4.2592		arm>p35 RNAi 2 rp49	17.1013		arm>p35 RNAi 2 p35	22.6064	5.5051		1.2459	0.421645
