# Supplementary material for: Stress-induced Cdk5 activity enhances cytoprotective basal autophagy in Drosophila melanogaster by phosphorylating acinus at serine437
Source: eLife. 2017 Dec 11;6:e30760. doi: 10.7554/eLife.30760 (PMC5760206; doi:10.7554/eLife.30760)
Supplement: Figure 7—source data 1. [file elife-30760-fig7-data1.xlsx]

## Sheet: Atg8a punctae Figure 7 K
Quantification of ATG8a punctae in eye discs
Sample	WT	p35	p35; Acnwt	p35; AcnS437A	p35; AcnS437D
1	124	61	71	65	131
2	132	51	59	47	121
3	117	45	52	57	109
4	137	55	65	49	141
5	151	71	75	72	136
6	115	49	52	71	119

## Sheet: p62 punctae Figure 7L
Quantification of p62 punctae in eye discs
Sample	WT	p35	p35; Acnwt	p35; AcnS437A	p35; AcnS437D
1	65	239	147	161	87
2	37	154	197	182	49
3	55	222	178	195	72
4	81		211
