# Supplementary material for: Stress-induced Cdk5 activity enhances cytoprotective basal autophagy in Drosophila melanogaster by phosphorylating acinus at serine437
Source: eLife. 2017 Dec 11;6:e30760. doi: 10.7554/eLife.30760 (PMC5760206; doi:10.7554/eLife.30760)
Supplement: Figure 8—source data 1. [file elife-30760-fig8-data1.xlsx]

## Sheet: pS437-Acn Figure 8F
Quantification of pS437-Acn levels in eye discs
Sample	Area	Mean	Min	Max	Int Den	% Area	Raw Int Den
Gmr Gal4/+_1	3006.77	20.798	0	255	62535.7	8.156	3600600
Gmr Gal4/+_2	3051.23	11.146	0	255	34009.3	4.371	1958145
Gmr Gal4/+_3	2995.32	27.014	0	255	80916.7	10.594	4157520
Gmr Gal4/+_4	3070.96	21.845	0	255	67084.2	8.567	3862485
Gmr Gal4/+_5	3046.75	23.151	0	255	70534.3	9.079	4061130
GMR>Htt.Q93_1	3068.43	55.269	0	255	169590	21.674	9764460
GMR>Htt.Q93_2	2983.91	65.068	0	255	194157	25.517	11178945
GMR>Htt.Q93_3	3090.7	56.529	0	255	174715	22.168	10059495
GMR>Htt.Q93_4	3022.06	66.052	0	255	199614	25.903	11493105
GMR>Htt.Q93_5	3087.24	59.746	0	255	184449	23.43	10619985
GMR-Htt.Q120_1	3077.72	76.014	0	255	233951	29.81	13470120
GMR-Htt.Q120_2	2967.82	55.524	0	255	164785	21.774	9487785
GMR-Htt.Q120_3	3017.05	87.7	0	255	264594	34.392	15234465
GMR-Htt.Q120_4	3073.8	94.292	0	255	289834	36.977	16687710
GMR-Htt.Q120_5	3010.7	96.105	0	255	289343	37.688	16659405
GMR>Htt.Q93/p35RNAi_1	3020.18	5.071	0	255	15315	1.989	881790
GMR>Htt.Q93/p35RNAi_2	3001.21	3.654	0	255	10965.9	1.433	631380
GMR>Htt.Q93/p35RNAi_3	3015.02	2.986	0	255	9003.9	1.171	518415
GMR>Htt.Q93/p35RNAi_4	3037.17	5.646	0	255	17148.6	2.214	987360
GMR>Htt.Q93/p35RNAi_5	3028.1	4.253	0	255	12879.2	1.668	741540
p35; GMR-Htt.120_1	3047.17	0.142	0	255	434.03	0.056	24990
p35; GMR-Htt.120_2	3036.75	0.381	0	255	1155.94	0.149	66555
p35; GMR-Htt.120_3	3017.19	0.392	0	255	1182.51	0.154	68085
p35; GMR-Htt.120_4	3058.32	1.031	0	255	3153.36	0.404	181560
p35; GMR-Htt.120_5	3048.73	0.476	0	255	1452.67	0.187	83640

## Sheet: PolyQ Figure 8 L
Quantification of PolyQ levels in eye discs
Sample	Area	Mean	Min	Max	Int Den	% Area	Raw Int Den
GMR-Htt.q120;p35_1	11597.3	58.605	0	255	679661	22.982	15775320
GMR-Htt.q120;p35_2	11417.4	46.55	0	255	531477	18.255	12335880
GMR-Htt.q120;p35_3	11763.4	57.553	0	255	677025	22.57	15714120
GMR-Htt.q120;p35_4	11464.2	63.1	0	255	723387	24.745	16790220
GMR-Htt.q120;p35_5	11452.4	73.069	0	255	836810	28.654	19422840
GMR-Htt.q120;s437d_1	11472.7	6.775	0	255	77728.6	2.657	1804125
GMR-Htt.q120;s437d_2	11761.9	10.787	0	255	126871	4.23	2944740
GMR-Htt.q120;s437d_3	11702	8.881	0	255	103920	3.483	2412045
GMR-Htt.q120;s437d_4	11458.6	14.569	0	255	166938	5.713	3874725
GMR-Htt.q120;s437d_5	11237.6	11.09	0	255	124629	4.349	2892720
GMR-Htt.q120;acn wt_1	11454.4	26.355	0	255	301884	10.335	7006890
GMR-Htt.q120;acn wt_2	11379.3	28.016	0	255	318803	10.987	7399590
GMR-Htt.q120;acn wt_3	11413.5	26.757	0	255	305388	10.493	7088235
GMR-Htt.q120;acn wt_4	11652.4	32.652	0	255	380469	12.805	8830905
GMR-Htt.q120;acn wt_5	11354.1	34.09	0	255	387061	13.369	8983905
GMR-Htt.q120;s437a_1	11438	26.823	0	255	306806	10.519	7121130
GMR-Htt.q120;s437a_2	11434.4	26.107	0	255	298522	10.238	6928860
GMR-Htt.q120;s437a_3	10599.7	26.229	0	255	278021	10.286	6453030
GMR-Htt.q120;s437a_4	11636.4	31.613	0	255	367857	12.397	8538165
GMR-Htt.q120;s437a_5	11228.7	31.947	0	255	358727	12.528	8326260
GMR Gal4/+_1	11219	0.738	0	255	8283.73	0.29	192270
GMR Gal4/+_2	11407.5	0.172	0	255	1966.56	0.068	45645
GMR Gal4/+_3	11114.9	0.709	0	255	7877.23	0.278	182835
GMR Gal4/+_4	11293	0.806	0	255	9107.71	0.316	211395
GMR Gal4/+_5	11566.2	0.612	0	255	7075.23	0.24	164220
