# Supplementary material for: Stress-induced Cdk5 activity enhances cytoprotective basal autophagy in Drosophila melanogaster by phosphorylating acinus at serine437
Source: eLife. 2017 Dec 11;6:e30760. doi: 10.7554/eLife.30760 (PMC5760206; doi:10.7554/eLife.30760)
Supplement: Figure 9—source data 1. [file elife-30760-fig9-data1.xlsx]

## Sheet: Sheet1
Quantification of pS437-Acn in neurodegenerative model eye discs
	Sample	Area	Mean	Min	Max	Int Den	% Area	Raw Int Den
	Gmr>ATX1.82Q_1	3063.5	128.506	0	255	393678	50.395	22666695
	Gmr>ATX1.82Q_2	3098.2	146.994	0	255	455415	57.645	23399310
	Gmr>ATX1.82Q_3	3045.76	182.726	0	255	556541	71.657	28595190
	Gmr>ATX1.82Q_4	3049.27	154.147	0	255	470036	60.45	24150540
	Gmr>ATX1.82Q_5	3060.48	143.832	0	255	440193	56.405	22617225
	Gmr>SCA3.Q78_1	2956.51	106.724	0	255	315531	41.853	18167220
	Gmr>SCA3.Q78_2	3094.59	93.304	0	255	288736	36.59	16624470
	Gmr>SCA3.Q78_3	3103.96	118.421	0	255	367574	46.44	21163725
	Gmr>APP.A beta 42_1	3453.39	87.422	0	255	301903	34.283	17382585
	Gmr>APP.A beta 42_2	3030.7	150.786	0	255	456988	59.132	23480145
	Gmr>APP.A beta 42_3	3016.72	89.699	0	255	270598	35.176	13903365
	Gmr>APP.A beta 42_4	3060.48	80.983	0	255	247847	31.758	12734445
	Gmr>APP.A beta 42_5	2990.88	83.402	0	255	249445	32.707	12816555
	Gmr Gal4/+_1	3006.77	20.798	0	255	62535.7	8.156	3600600
	Gmr Gal4/+_2	3051.23	11.146	0	255	34009.3	4.371	1958145
	Gmr Gal4/+_3	2995.32	27.014	0	255	80916.7	10.594	4157520
	Gmr Gal4/+_4	3070.96	21.845	0	255	67084.2	8.567	3862485
	Gmr Gal4/+_5	3046.75	23.151	0	255	70534.3	9.079	4061130
	GMR>SNCA _1	3088.7	22.352	0	255	69037.3	8.765	3974940
	GMR>SNCA _2	3063.88	24.576	0	255	75298.6	9.638	3868860
	GMR>SNCA _3	3057.85	24.407	0	255	74633.6	9.571	3834690
	GMR>hSOD1_1	2969.95	22.696	0	255	67407.5	8.901	3881100
	GMR>hSOD1_2	2943.27	37.432	0	255	110173	14.679	6343380
	GMR>hSOD1_3	3027.79	24.859	0	255	75268.7	9.749	4333725
